# Supplementary material
Source: publisher figshare collection journal article supplement (https://acs.figshare.com/ndownloader/files/4112902)
Supplement: Supplementary file 1 [file 4112902]

Supplementary Figures

A

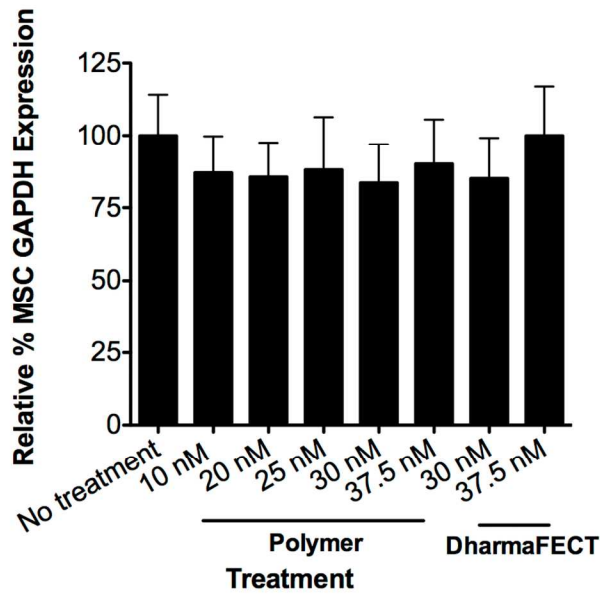

B

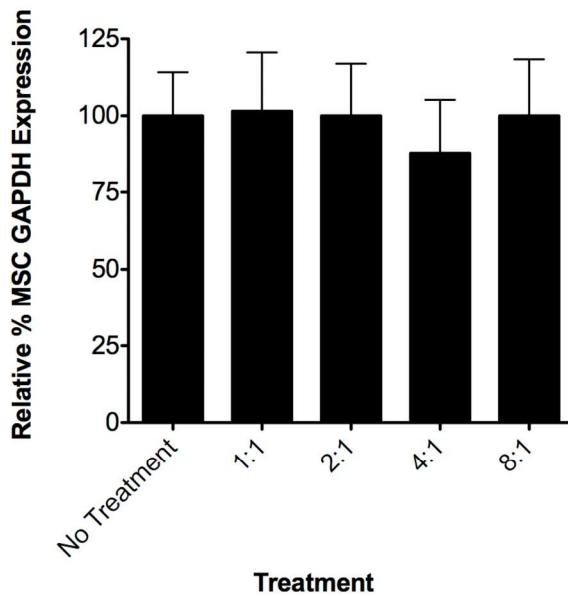

**Figure S1.** Assessment of non-specific control siRNA knockdown of GAPDH in MSCs at a variety of siRNA concentrations and charge ratios delivered via polymer diblock or DharmaFECT carriers. (A) MSCs were treated with Dharmacon ON-TARGETplus Non-targeting siRNA #1 at different concentrations with charge ratio of 4:1 (diblock

copolymer carrier) or by manufacturer's recommendations (DharmaFECT) and after 48 hours analyzed for non-specific changes in GAPDH gene expression using RT-PCR with  $\beta$ -actin as the housekeeping gene (see Table 1 for primer sequences used). (B) MSCs were treated with Dharmacon ON-TARGETplus Non-targeting siRNA #1 at 37.5 nM with charge ratios of 1:1-8:1 using the diblock copolymer delivery system. Data are from two independent experiments conducted in triplicate relative to gene expression of untreated cells (No Treatment) with error bars representing standard deviation. Statistical significance was evaluated at a level of  $p < 0.05$  and no differences were detected.
